# Supplementary material for: Comparative Transcriptome Analysis Reveals Inhibitory Roles of Strigolactone in Axillary Bud Outgrowth in Ratoon Rice
Source: Plants (Basel). 2024 Mar 21;13(6):899. doi: 10.3390/plants13060899 (PMC10975295; doi:10.3390/plants13060899)
Supplement: Supplementary file 1 [file plants-13-00899-s001.zip › plants-2877912-Table S1.3.2.xlsx]

## Sheet: Table S1
Table S1. Statistical table of sequence alignment results between sample sequencing data and selected reference genomes
Sample	Raw Reads Number	Raw Bases Number	Clean Reads Number	Clean Bases Number	Clean Q20（%）	Clean Q30（%）
CK0h_1	28980721	8694216300	28682458	8604737400	97.77	94.26
CK0h_2	24643242	7392972600	23881115	7164334500	97.65	94.05
CK0h_3	32596245	9778873500	32080703	9624210900	97.77	94.23
CK6h_1	28471167	8541350100	27920648	8376194400	97.82	94.42
CK6h_2	30620239	9186071700	30197554	9059266200	97.83	94.35
CK6h_3	30381514	9114454200	30023926	9007177800	97.82	94.24
GR6h_1	25288464	7586539200	24839082	7451724600	97.77	94.26
GR6h_2	22743306	6822991800	22193080	6657924000	97.15	93.32
GR6h_3	27178173	8153451900	26438192	7931457600	97.72	94.08
CK12h_1	26324944	7897483200	25637478	7691243400	97.77	94.23
CK12h_2	29275197	8782559100	28599196	8579758800	97.8	94.45
CK12h_3	22142778	6642833400	21782495	6534748500	97.82	94.28
GR12h_1	29500840	8850252000	28803185	8640955500	97.8	94.44
GR12h_2	20813080	6243924000	20379608	6113882400	97.7	94.08
GR12h_3	28813254	8643976200	28073562	8422068600	97.81	94.42

## Sheet: Table S2
Table S2. Stastical analysis on total mapped, and mulitple mapped reads in 15 samples
Sample_name	Total reads	Total mapped	Multiple mapped	Uniquely mapped	Reads map to '+'	Reads map to '-'	Non-splice reads	Splice reads
CK0h_1	57364916	53155950 (92.66%)	2241762 (3.91%)	50914188 (88.75%)	25458209 (44.38%)	25455979 (44.38%)	35134145 (61.25%)	15780043 (27.51%)
CK0h_2	47762230	44255026 (92.66%)	1653102 (3.46%)	42601924 (89.2%)	21294236 (44.58%)	21307688 (44.61%)	30668316 (64.21%)	11933608 (24.99%)
CK0h_3	64161406	59566378 (92.84%)	2385042 (3.72%)	57181336 (89.12%)	28584327 (44.55%)	28597009 (44.57%)	40086369 (62.48%)	17094967 (26.64%)
CK6h_1	55841296	51273914 (91.82%)	1806547 (3.24%)	49467367 (88.59%)	24723854 (44.28%)	24743513 (44.31%)	35061191 (62.79%)	14406176 (25.8%)
CK6h_2	60395108	55889103 (92.54%)	2069955 (3.43%)	53819148 (89.11%)	26911555 (44.56%)	26907593 (44.55%)	40191873 (66.55%)	13627275 (22.56%)
CK6h_3	60047852	55415026 (92.28%)	2064686 (3.44%)	53350340 (88.85%)	26676160 (44.42%)	26674180 (44.42%)	34858004 (58.05%)	18492336 (30.8%)
GR6h_1	49678164	45259532 (91.11%)	1873768 (3.77%)	43385764 (87.33%)	21685260 (43.65%)	21700504 (43.68%)	32934450 (66.3%)	10451314 (21.04%)
GR6h_2	44386160	39595273 (89.21%)	1847427 (4.16%)	37747846 (85.04%)	18867057 (42.51%)	18880789 (42.54%)	30367761 (68.42%)	7380085 (16.63%)
GR6h_3	52876384	49045778 (92.76%)	1809969 (3.42%)	47235809 (89.33%)	23618885 (44.67%)	23616924 (44.66%)	31755389 (60.06%)	15480420 (29.28%)
CK12h_1	51274956	47180346 (92.01%)	1671294 (3.26%)	45509052 (88.75%)	22754705 (44.38%)	22754347 (44.38%)	30208313 (58.91%)	15300739 (29.84%)
CK12h_2	57198392	52833704 (92.37%)	1909326 (3.34%)	50924378 (89.03%)	25461940 (44.52%)	25462438 (44.52%)	35817702 (62.62%)	15106676 (26.41%)
CK12h_3	43564990	40204179 (92.29%)	1458566 (3.35%)	38745613 (88.94%)	19371085 (44.46%)	19374528 (44.47%)	25855449 (59.35%)	12890164 (29.59%)
GR12h_1	57606370	52948191 (91.91%)	1965199 (3.41%)	50982992 (88.5%)	25488112 (44.25%)	25494880 (44.26%)	36040637 (62.56%)	14942355 (25.94%)
GR12h_2	40759216	37802664 (92.75%)	1356248 (3.33%)	36446416 (89.42%)	18222858 (44.71%)	18223558 (44.71%)	24857966 (60.99%)	11588450 (28.43%)
GR12h_3	56147124	52148193 (92.88%)	1913661 (3.41%)	50234532 (89.47%)	25115747 (44.73%)	25118785 (44.74%)	34802819 (61.99%)	15431713 (27.48%)

## Sheet: Table S3
Table S3. Primer list used in this study
Gene		Primer sequences 5’-3’
OsCKX5	F	AAAGGAGAGGTGGTGACCTG
	R	GGTGAACTCGGTGAAGTTGG
OsARF19	F	AGCATGATCAACACAGAAAAGG
	R	AAGGGAGCTTGGAACTGACA
OsIAA25	F	GCTCACCAGAGGCCTAATGA
	R	CAGGTTCTTGCGGAATGC
IPA1	F	TGCATTCCAAGGCTCCCCGC
	R	TGCGGCAGCTGCGTTTTCCT
FC1	F	CGACAGCGGCAGCTACTAC
	R	GCGAATTGGCGTAGACGA
D27	F	GATTCCATGCCAGAAGTTCATC
	R	ATCTCACAGCTCATGTCTTCAA
D53	F	GCATGGAAATCAGAGGAGGATA
	R	TAGAGCTACTCACATGCTTACG
OsSDH	F	CGAAAAAGCAGTAAGTCTTGCT
	R	GGGCATATACCGCATCAAATAC
OsRR9	F	AACATATCTGTGCTAGCTTTGC
	R	AAAGAAGAGGTCTTGAGTAGCC
OsSUT1	F	CATTCATCCTCTACGACACTGA
	R	CACAATCGAATTCAGTAGCAGG
OsERF102	F	CAGATGACTCCGACTCTGTC
	R	CTTCATCCAGCTTCATCAGGTC
OsERF67	F	GGGAGTTCATGGACTACGAC
	R	GTGTGGATGTTATCAAAGCTCC
OsERF25	F	GGACCAAGTTCAAGGAGACG
	R	CCATCTCTGCTGTCTCGAAC
Actin	F	CTTCATAGGAATGGAAGCTGCGGGTA
	R	CGACCACCTTGATCTTCATGCTGCTA
